# Supplementary material
Source: PubMed Central journal article supplement (PMC5962330)
Supplement: Supp_Table1.pdf [file Supp_Table1.pdf]

SUPPLEMENTARY TABLE S1. THROMBOCYTOSIS IN *MPL<sup>f/f</sup>;PF4<sup>Cre</sup>* MICE

| <i>Genotype</i>                   | <i>Mpl<sup>f/f</sup></i> | <i>Mpl<sup>f/+</sup>;PF4<sup>Cre</sup></i> | <i>Mpl<sup>f/f</sup>;PF4<sup>Cre</sup></i> |
|-----------------------------------|--------------------------|--------------------------------------------|--------------------------------------------|
| <i>N</i>                          | 9                        | 10                                         | 11                                         |
| Platelet count, $\times 10^9/L$   | 1,052 $\pm$ 211          | 1,051 $\pm$ 207                            | 11,986 $\pm$ 1,867*                        |
| Hematocrit, %                     | 47 $\pm$ 10              | 51 $\pm$ 6                                 | 49 $\pm$ 16                                |
| White cell count, $\times 10^9/L$ | 23 $\pm$ 2               | 24 $\pm$ 5                                 | 64 $\pm$ 19*                               |
| Neutrophil, $\times 10^9/L$       | 5.1 $\pm$ 0.5            | 6.8 $\pm$ 1.6                              | 7.3 $\pm$ 4.3                              |
| Lymphocyte, $\times 10^9/L$       | 16.8 $\pm$ 1.3           | 14.9 $\pm$ 2.5                             | 47.7 $\pm$ 17*                             |
| Monocyte, $\times 10^9/L$         | 0.7 $\pm$ 0.2            | 1.3 $\pm$ 0.3                              | 8.3 $\pm$ 2.2*                             |
| Eosinophil, $\times 10^9/L$       | 0.3 $\pm$ 0.1            | 0.9 $\pm$ 0.6                              | 0.2 $\pm$ 0.1                              |

Mice were analyzed at 8–12 weeks of age, one-way ANOVA followed by Tukey's HSD, \* $p < 0.01$ . ANOVA, analysis of variance; HSD, honest significant difference.
